# Supplementary material for: The Development and Evaluation of a Literature-Based Dietary Index for Gut Microbiota
Source: MDPI journal article supplement (doi:10.3390/nu16071045), 2024-04-03
Supplement: s1 [file s1]

## Supplementary Material S1: Search Strings for Pubmed and Embase Databases

### 1. PubMed (n=5,828)

((("gastrointestinal tract"[MeSH Terms] OR "gastrointestin\*"[Title/Abstract] OR "Gut"[Title/Abstract] OR "intestin\*"[Title/Abstract] OR "colon\*"[Title/Abstract] OR "feces"[MeSH Terms] OR "feces"[Title/Abstract] OR "faecal"[Title/Abstract]) AND ("microbiota"[MeSH Terms] OR "gastrointestinal microbiome"[MeSH Terms] OR "dysbiosis"[MeSH Terms] OR ("alpha diversity"[Title/Abstract] OR "alpha diversity"[Title/Abstract] OR "Acetate"[Title/Abstract] OR "Bacteroides"[Title/Abstract] OR "Bacteroidetes"[Title/Abstract] OR "beta diversity"[Title/Abstract] OR "beta diversity"[Title/Abstract] OR "Bifidobacterium"[Title/Abstract] OR "Butyrate"[Title/Abstract]) OR ("bacteria"[Title/Abstract] OR "flora"[Title/Abstract] OR "Microbial"[Title/Abstract] OR "microflora"[Title/Abstract] OR "dysbiosis"[Title/Abstract] OR "microbial profile"[Title/Abstract] OR "Firmicutes"[Title/Abstract] OR "microbial communit\*"[Title/Abstract] OR "microbes"[Title/Abstract] OR "metabolom\*"[Title/Abstract] OR "microbial composition"[Title/Abstract] OR "microbial diversity"[Title/Abstract] OR "microbiome"[Title/Abstract] OR "microbiota"[Title/Abstract] OR "shannon diversity index"[Title/Abstract] OR "shannon index"[Title/Abstract] OR ("short chain fatty acid\*"[Title/Abstract] OR "scfa"[Title/Abstract]))) AND ("diet"[MeSH Terms] OR "food"[MeSH Terms] OR "nutrients"[MeSH Terms] OR "diet\*"[Title/Abstract] OR "energy intake\*"[Title/Abstract] OR "food\*"[Title/Abstract] OR "macronutrient\*"[Title/Abstract] OR "nutrient\*"[Title/Abstract] OR ("adzuki"[Title/Abstract] OR "bean\*"[Title/Abstract] OR "cannellini"[Title/Abstract] OR "chickpea\*"[Title/Abstract] OR "dietary pulse\*"[Title/Abstract] OR "fava"[Title/Abstract] OR "faba"[Title/Abstract] OR "haricots"[Title/Abstract] OR

"legum\*"[Title/Abstract] OR "lentil\*"[Title/Abstract] OR "lupin\*"[Title/Abstract] OR  
 "lupinus"[Title/Abstract] OR "mung"[Title/Abstract] OR "Pea"[Title/Abstract] OR  
 "Peas"[Title/Abstract]) OR ("Nuts"[MeSH Terms] OR "almond\*"[Title/Abstract] OR  
 "cashew\*"[Title/Abstract] OR "chestnut\*"[Title/Abstract] OR "groundnut\*"[Title/Abstract] OR  
 "hazelnut\*"[Title/Abstract] OR "macadamia\*"[Title/Abstract] OR "Nut"[Title/Abstract] OR  
 "Nuts"[Title/Abstract] OR "peanut\*"[Title/Abstract] OR "pecan\*"[Title/Abstract] OR  
 "pistachio\*"[Title/Abstract] OR "walnut\*"[Title/Abstract]) OR ("soy foods"[MeSH Terms] OR  
 "plant proteins"[MeSH Terms] OR "Miso"[Title/Abstract] OR "soybean\*"[Title/Abstract] OR  
 "Soy"[Title/Abstract] OR "Tofu"[Title/Abstract]) OR ("grain proteins"[MeSH Terms] OR  
 "whole grains"[MeSH Terms] OR "amaranth"[Title/Abstract] OR "barley"[Title/Abstract] OR  
 "bran"[Title/Abstract] OR "bread"[Title/Abstract] OR "buckwheat"[Title/Abstract] OR  
 "bulgar"[Title/Abstract] OR "canary seed\*"[Title/Abstract] OR "cereal\*"[Title/Abstract] OR  
 "corn"[Title/Abstract] OR "couscous"[Title/Abstract] OR "durum"[Title/Abstract] OR  
 "einkorn"[Title/Abstract] OR "emmer"[Title/Abstract] OR "farro"[Title/Abstract] OR  
 "grain\*"[Title/Abstract] OR "kamut"[Title/Abstract] OR "maize"[Title/Abstract] OR  
 "millet"[Title/Abstract] OR "oats"[Title/Abstract] OR "pasta"[Title/Abstract] OR  
 "quinoa"[Title/Abstract] OR "rice"[Title/Abstract] OR "rye"[Title/Abstract] OR  
 "spelta"[Title/Abstract] OR "spelt"[Title/Abstract] OR "sorghum"[Title/Abstract] OR  
 "teff"[Title/Abstract] OR "triticale"[Title/Abstract] OR "whole grain\*"[Title/Abstract] OR  
 "wholegrain\*"[Title/Abstract] OR "wheat"[Title/Abstract]) OR ("dairy products"[MeSH Terms]  
 OR "milk proteins"[MeSH Terms] OR "butter"[Title/Abstract] OR "buttermilk"[Title/Abstract]  
 OR "casein"[Title/Abstract] OR "cheese"[Title/Abstract] OR "cream"[Title/Abstract] OR  
 "dair\*"[Title/Abstract] OR "ghee"[Title/Abstract] OR "kefir"[Title/Abstract] OR

"milk"[Title/Abstract] OR "whey"[Title/Abstract] OR "yogurt"[Title/Abstract] OR  
 "yoghurt"[Title/Abstract]) OR ("egg proteins, dietary"[MeSH Terms] OR "fish proteins,  
 dietary"[MeSH Terms] OR "meat"[MeSH Terms] OR "bacon\*"[Title/Abstract] OR  
 "beef"[Title/Abstract] OR "chicken"[Title/Abstract] OR "duck"[Title/Abstract] OR  
 "Egg"[Title/Abstract] OR "Eggs"[Title/Abstract] OR "Fish"[Title/Abstract] OR  
 "goat"[Title/Abstract] OR "ham"[Title/Abstract] OR "hot dog\*"[Title/Abstract] OR  
 "lamb"[Title/Abstract] OR "liver"[Title/Abstract] OR "meat\*"[Title/Abstract] OR  
 "mutton"[Title/Abstract] OR "pastrami"[Title/Abstract] OR "pork"[Title/Abstract] OR  
 "poultry"[Title/Abstract] OR "rabbit"[Title/Abstract] OR "salami\*"[Title/Abstract] OR  
 "sausage\*"[Title/Abstract] OR "seafood"[Title/Abstract] OR "turkey"[Title/Abstract] OR  
 "veal"[Title/Abstract]) OR ("fruit"[MeSH Terms] OR "fruit proteins"[MeSH Terms] OR  
 "apple\*"[Title/Abstract] OR "apricot\*"[Title/Abstract] OR "avocado\*"[Title/Abstract] OR  
 "banana\*"[Title/Abstract] OR "berries"[Title/Abstract] OR "blackberr\*"[Title/Abstract] OR  
 "blueberr\*"[Title/Abstract] OR "cantaloupe"[Title/Abstract] OR "cherr\*"[Title/Abstract] OR  
 "citrus"[Title/Abstract] OR "cranberr\*"[Title/Abstract] OR "fruit\*"[Title/Abstract] OR  
 "grape\*"[Title/Abstract] OR "grapefruit\*"[Title/Abstract] OR "guava\*"[Title/Abstract] OR  
 "juice\*"[Title/Abstract] OR "kiwi\*"[Title/Abstract] OR "lingonberr\*"[Title/Abstract] OR  
 "mandarin\*"[Title/Abstract] OR "mango\*"[Title/Abstract] OR "melon\*"[Title/Abstract] OR  
 "nectarine\*"[Title/Abstract] OR "orange\*"[Title/Abstract] OR "papaya\*"[Title/Abstract] OR  
 "peach\*"[Title/Abstract] OR "pear"[Title/Abstract] OR "pears"[Title/Abstract] OR  
 "pineapple\*"[Title/Abstract] OR "plum"[Title/Abstract] OR "plums"[Title/Abstract] OR  
 "prune\*"[Title/Abstract] OR "raspberr\*"[Title/Abstract] OR "raisin"[Title/Abstract] OR  
 "raisins"[Title/Abstract] OR "satsuma\*"[Title/Abstract] OR "strawberr\*"[Title/Abstract] OR

"tangerine\*"[Title/Abstract] OR "berry"[Title/Abstract]) OR ("vegetables"[MeSH Terms] OR  
 "artichoke\*"[Title/Abstract] OR "asparagus"[Title/Abstract] OR "aubergine\*"[Title/Abstract]  
 OR "beetroot\*"[Title/Abstract] OR "beets"[Title/Abstract] OR "broccoli\*"[Title/Abstract] OR  
 "brussel sprout\*"[Title/Abstract] OR "cabbage\*"[Title/Abstract] OR "carrot\*"[Title/Abstract]  
 OR "cauliflower\*"[Title/Abstract] OR "celery"[Title/Abstract] OR "chard"[Title/Abstract] OR  
 "cucumber\*"[Title/Abstract] OR "fennel"[Title/Abstract] OR "garlic"[Title/Abstract] OR  
 "kale"[Title/Abstract] OR "leek\*"[Title/Abstract] OR "lettuce\*"[Title/Abstract] OR  
 "okra"[Title/Abstract] OR "onion\*"[Title/Abstract] OR "parsnip\*"[Title/Abstract] OR  
 "pepper\*"[Title/Abstract] OR "potato\*"[Title/Abstract] OR "pumpkin\*"[Title/Abstract] OR  
 "rhubarb"[Title/Abstract] OR "salad\*"[Title/Abstract] OR "spinach\*"[Title/Abstract] OR  
 "squash"[Title/Abstract] OR "tomato\*"[Title/Abstract] OR "turnip\*"[Title/Abstract] OR  
 "vegetable\*"[Title/Abstract] OR "yams"[Title/Abstract] OR "yam"[Title/Abstract]) OR ("dietary  
 fats"[MeSH Terms] OR "fiber\*"[Title/Abstract] OR "fibre\*"[Title/Abstract] OR "vitamin  
 c"[Title/Abstract] OR "vitamin e"[Title/Abstract] OR "ascorbic acid"[Title/Abstract] OR  
 "carotenoid\*"[Title/Abstract] OR "flavonoid\*"[Title/Abstract] OR "beta  
 glucan\*"[Title/Abstract] OR "oil"[Title/Abstract] OR "oils"[Title/Abstract] OR  
 "margarine"[Title/Abstract] OR "polyphenol\*"[Title/Abstract]) OR ("beverages"[MeSH Terms]  
 OR "beverages"[MeSH Terms] OR "beverage\*"[Title/Abstract] OR "caffein\*"[Title/Abstract]  
 OR "candy"[Title/Abstract] OR "candies"[Title/Abstract] OR "chocolate\*"[Title/Abstract] OR  
 "coffee"[Title/Abstract] OR "drink"[Title/Abstract] OR "honey"[Title/Abstract] OR  
 "juice\*"[Title/Abstract] OR "pop"[Title/Abstract] OR "salt"[Title/Abstract] OR  
 "soda"[Title/Abstract] OR "sodium"[Title/Abstract] OR "sugar\*"[Title/Abstract] OR  
 "sweet\*"[Title/Abstract] OR "tea"[Title/Abstract] OR "dietary sugars"[MeSH Terms])))) NOT

("animals"[MeSH Terms] NOT "humans"[MeSH Terms])) AND ("cohort studies"[MeSH  
 Terms:noexp] OR "longitudinal studies"[MeSH Terms:noexp] OR "follow up studies"[MeSH  
 Terms:noexp] OR "prospective studies"[MeSH Terms:noexp] OR "retrospective studies"[MeSH  
 Terms:noexp] OR "cohort"[Title/Abstract] OR "longitudinal"[Title/Abstract] OR  
 "prospective"[Title/Abstract] OR "retrospective"[Title/Abstract] OR ("Clinical  
 Trial"[Publication Type:noexp] OR "clinical trial, phase i"[Publication Type] OR "clinical trial,  
 phase ii"[Publication Type] OR "clinical trial, phase iii"[Publication Type] OR "clinical trial,  
 phase iv"[Publication Type] OR "controlled clinical trial"[Publication Type] OR "multicenter  
 study"[Publication Type] OR "randomized controlled trial"[Publication Type] OR "Clinical  
 Trials as Topic"[MeSH Terms:noexp] OR "clinical trials, phase i as topic"[MeSH Terms:noexp]  
 OR "clinical trials, phase ii as topic"[MeSH Terms:noexp] OR "clinical trials, phase iii as  
 topic"[MeSH Terms:noexp] OR "clinical trials, phase iv as topic"[MeSH Terms:noexp] OR  
 "controlled clinical trials as topic"[MeSH Terms:noexp] OR "randomized controlled trials as  
 topic"[MeSH Terms:noexp] OR "early termination of clinical trials"[MeSH Terms:noexp] OR  
 "multicenter studies as topic"[MeSH Terms:noexp] OR "Double-Blind Method"[MeSH Terms]  
 OR (("randomised"[Title/Abstract] OR "randomized"[Title/Abstract]) AND  
 ("trial"[Title/Abstract] OR "trials"[Title/Abstract])) OR (("single"[Title/Abstract] OR  
 "double"[Title/Abstract] OR "doubled"[Title/Abstract] OR "triple"[Title/Abstract] OR  
 "tripled"[Title/Abstract] OR "treble"[Title/Abstract] OR "treble"[Title/Abstract]) AND  
 ("blind\*"[Title/Abstract] OR "mask\*"[Title/Abstract])) OR ("4 arm"[Title/Abstract] OR "four  
 arm"[Title/Abstract]) OR "evaluation studies"[Publication Type] OR "evaluation studies as  
 topic"[MeSH Terms:noexp] OR "program evaluation"[MeSH Terms:noexp] OR "validation  
 studies as topic"[MeSH Terms:noexp] OR ("pre"[Title/Abstract] AND "post"[Title/Abstract])

OR ("pretest"[Title/Abstract] AND "posttest"[Title/Abstract]) OR ("program\*"[Title/Abstract]  
AND ("evaluat\*"[Title/Abstract] OR "effectiveness"[Title/Abstract])) OR  
"intervention"[Title/Abstract])) AND ((english[Filter]) AND (2008:2021[pdat]))

## **2. Embase (n=9,695)**

('crossover procedure':de OR 'double-blind procedure':de OR 'randomized controlled trial':de OR  
'single-blind procedure':de OR random\*:de,ab,ti OR factorial\*:de,ab,ti OR crossover\*:de,ab,ti  
OR ((cross NEXT/1 over\*):de,ab,ti) OR placebo\*:de,ab,ti OR ((doubl\* NEAR/1 blind\*):de,ab,ti)  
OR ((singl\* NEAR/1 blind\*):de,ab,ti) OR assign\*:de,ab,ti OR allocat\*:de,ab,ti OR  
volunteer\*:de,ab,ti OR 'controlled clinical trial'/exp OR trial:ti,ab OR 'clinical article'/exp OR  
'controlled study'/exp OR 'major clinical study'/exp OR 'prospective study'/exp OR 'cohort  
analysis'/exp OR 'cohort':ti,ab OR 'compared':ti,ab OR 'groups':ti,ab OR 'multivariate':ti,ab OR  
'program evaluation'/exp OR 'follow-up studies'/exp OR 'cross-over studies'/exp OR 'pretest  
posttest control group design'/exp OR 'control group'/exp OR 'parallel design'/exp) AND  
('gastrointestinal tract'/exp OR 'gastrointestinal tract' OR gastrointestin\*:ab,ti OR gut:ab,ti OR  
'intestine'/exp OR 'intestine' OR intestin\*:ab,ti OR colon:ab,ti OR 'feces'/exp OR 'feces' OR  
feces:ab,ti OR faecal:ab,ti OR colon\*:ti,ab) AND ('intestine flora'/exp OR 'feces microflora'/exp  
OR 'dysbiosis'/exp OR 'bacterial microbiome'/exp OR ' $\alpha$  diversity':ab,ti OR 'alpha diversity':ab,ti  
OR acetate:ab,ti OR bacteroides:ab,ti OR bacteroidetes:ab,ti OR ' $\beta$  diversity':ab,ti OR 'beta  
diversity':ab,ti OR bifidobacterium:ab,ti OR butyrate:ab,ti OR bacteria:ab,ti OR flora:ab,ti OR  
microbial:ab,ti OR microflora:ab,ti OR dysbiosis:ab,ti OR 'microbial profile':ab,ti OR  
firmicutes:ab,ti OR 'microbial communit\*':ab,ti OR microbes:ab,ti OR metabolom\*:ab,ti OR  
'microbial composition':ab,ti OR 'microbial diversity':ab,ti OR microbiome:ab,ti OR  
microbiota:ab,ti OR 'shannon diversity index':ab,ti OR 'shannon index':ab,ti OR 'short chain fatty

acid\*:ab,ti OR scfa:ab,ti OR 'microflora'/exp) AND ('diet'/exp OR 'dietary intake'/exp OR  
 'food'/exp OR 'nutrient'/exp OR food\*:ab,ti OR diet\*:ab,ti OR 'energy intake\*:ab,ti OR  
 macronutrient\*:ab,ti OR nutrient\*:ab,ti OR 'soybean'/exp OR 'soybean protein'/exp OR 'soy  
 food'/exp OR tofu:ab,ti OR miso:ab,ti OR soy:ab,ti OR soybean\*:ab,ti OR 'food grain'/exp OR  
 'whole grain\*:ab,ti OR amaranth:ab,ti OR barley:ab,ti OR bran:ab,ti OR bread:ab,ti OR  
 buckwheat:ab,ti OR bulgar:ab,ti OR 'canary seed\*:ab,ti OR cereal\*:ab,ti OR corn:ab,ti OR  
 couscous:ab,ti OR 'triticum durum':ab,ti OR einkorn:ab,ti OR emmer:ab,ti OR farro:ab,ti OR  
 grain\*:ab,ti OR kamut:ab,ti OR maize:ab,ti OR millet:ab,ti OR oat:ab,ti OR oats:ab,ti OR  
 pasta:ab,ti OR quinoa:ab,ti OR rice:ab,ti OR rye:ab,ti OR spelt:ab,ti OR spelta:ab,ti OR  
 sorghum:ab,ti OR teff:ab,ti OR triticale:ab,ti OR wheat:ab,ti OR 'nut'/exp OR almond\*:ab,ti OR  
 cashew\*:ab,ti OR 'chestnut'/exp OR chestnut\*:ab,ti OR groundnut\*:ab,ti OR peanut\*:ab,ti OR  
 'hazelnut'/exp OR hazelnut\*:ab,ti OR macadamia\*:ab,ti OR nut:ab,ti OR nuts:ab,ti OR  
 pecan\*:ab,ti OR pistachio\*:ab,ti OR 'walnut'/exp OR walnut\*:ab,ti OR 'legume'/exp OR  
 adzuki:ab,ti OR bean\*:ab,ti OR cannellini:ab,ti OR chickpea\*:ab,ti OR 'dietary pulse\*:ab,ti OR  
 faba:ab,ti OR fava:ab,ti OR haricots:ab,ti OR legum\*:ab,ti OR lentil\*:ab,ti OR lupin\*:ab,ti OR  
 'mung bean':ab,ti OR pea:ab,ti OR peas:ab,ti OR 'dairy products'/exp OR butter:ab,ti OR  
 buttermilk:ab,ti OR casein:ab,ti OR cheese:ab,ti OR cream:ab,ti OR dair\*:ab,ti OR ghee:ab,ti OR  
 kefir:ab,ti OR milk:ab,ti OR whey:ab,ti OR yoghurt:ab,ti OR yogurt:ab,ti OR 'protein intake'/exp  
 OR 'egg'/exp OR 'fish consumption'/exp OR 'meat'/exp OR bacon:ab,ti OR beef:ab,ti OR  
 chicken:ab,ti OR duck:ab,ti OR egg:ab,ti OR eggs:ti,ab OR goat:ab,ti OR ham:ab,ti OR 'hot  
 dog\*:ab,ti OR lamb:ab,ti OR liver:ab,ti OR meat\*:ab,ti OR mutton:ab,ti OR pastrami:ab,ti OR  
 pork:ab,ti OR poultry:ab,ti OR rabbit:ab,ti OR salami\*:ab,ti OR sausage\*:ab,ti OR  
 'seafood\*:ab,ti OR turkey:ab,ti OR veal:ab,ti OR 'fruit'/exp OR apple\*:ab,ti OR apricot:ab,ti OR

avocado:ab,ti OR banana\*:ab,ti OR berry:ab,ti OR berries:ab,ti OR blackberr\*:ab,ti OR  
 cantaloupe\*:ab,ti OR cherry:ab,ti OR citrus:ab,ti OR cranberr\*:ab,ti OR fruit\*:ab,ti OR  
 grape\*:ab,ti OR grapefruit\*:ab,ti OR guava\*:ab,ti OR kiwi\*:ab,ti OR lingonberr\*:ab,ti OR  
 mandarin\*:ab,ti OR mango\*:ab,ti OR melon\*:ab,ti OR nectarine\*:ab,ti OR orange\*:ab,ti OR  
 papaya\*:ab,ti OR peach\*:ab,ti OR pear:ab,ti OR pears:ab,ti OR pineapple\*:ab,ti OR plum:ab,ti  
 OR plums:ab,ti OR prune\*:ab,ti OR raspberr\*:ab,ti OR raisin\*:ab,ti OR satsuma\*:ab,ti OR  
 tangerine\*:ab,ti OR 'vegetable'/exp OR artichoke\*:ab,ti OR asparagus:ab,ti OR aubergine\*:ab,ti  
 OR beetroot\*:ab,ti OR beets:ab,ti OR broccoli\*:ab,ti OR 'brussel sprout\*':ab,ti OR  
 cabbage\*:ab,ti OR carrot\*:ab,ti OR cauliflower\*:ab,ti OR celery:ab,ti OR chard:ab,ti OR  
 cucumber\*:ab,ti OR fennel:ab,ti OR garlic:ab,ti OR kale:ab,ti OR leek\*:ab,ti OR lettuce\*:ab,ti  
 OR okra:ab,ti OR onion\*:ab,ti OR parsnip\*:ab,ti OR pepper\*:ab,ti OR potato\*:ab,ti OR  
 pumpkin\*:ab,ti OR rhubarb:ab,ti OR salad\*:ab,ti OR spinach\*:ab,ti OR squash:ab,ti OR  
 tomato\*:ab,ti OR turnip\*:ab,ti OR vegetable\*:ab,ti OR yams:ab,ti OR yam:ab,ti OR 'fat  
 intake'/exp OR fiber:ab,ti OR fibre\*:ab,ti OR 'vitamin c':ab,ti OR 'vitamin e':ab,ti OR 'ascorbic  
 acid':ab,ti OR carotenoid\*:ab,ti OR flavonoid\*:ab,ti OR 'beta glucan\*':ab,ti OR oil:ab,ti OR  
 oils:ab,ti OR margarine:ab,ti OR polyphenol\*:ab,ti OR 'beverage'/exp OR beverage\*:ab,ti OR  
 caffein\*:ab,ti OR candy:ab,ti OR candies:ab,ti OR chocolate\*:ab,ti OR coffee:ab,ti OR  
 drink:ab,ti OR honey:ab,ti OR juice\*:ab,ti OR pop:ab,ti OR salt:ab,ti OR soda:ab,ti OR  
 sodium:ab,ti OR sugar\*:ab,ti OR sweet\*:ab,ti OR tea:ab,ti OR 'sugar intake'/exp) NOT  
 ([animals]/lim NOT [humans]/lim) AND [english]/lim AND [2008-2021]/py AND [embase]/lim  
 NOT ([embase]/lim AND [medline]/lim)



## Supplementary Material 2: Gut Microbiota Outcomes

- Change in alpha diversity (microbial diversity within each subject) and beta diversity (difference between each subject's) – Increase indicates beneficial effect, and the reverse indicates harmful effect
  - $\alpha$ -diversity indices (Observed species, Shannon index, Simpson index, and Chao 1 index)
  - $\beta$ -diversity dissimilarity based on Bray-Curtis distance
- Change in fecal short chain fatty acid (SCFA) levels
  - Beneficial change - Increase in total SCFA, butyrate, acetate, propionate, and Isobutyrate
- Change at phyla level – change in abundance of phyla Bacteroidetes, Firmicutes, Proteobacteria, Actinobacteria, Verrucomicrobia, Tenericutes, Fusobacteria, Saccharilbacteria, Chloroflexi, Acidobacteria, and Cyanobacteria
  - Beneficial phyla
    - Bacteroidetes (gram-negative bacteria - Bacteroides, Prevotella, Porphyromonas, Alistipes and Parabacteroides)
    - Firmicutes (gram-positive bacteria - butyrate producers – Lactobacillus (pro), Faecalibacterium (pro), Eubacterium, Roseburia, Anaerostipes, Clostridium perfringens and Ruminococcus)
    - Actinobacteria (Bifidobacteria)
  - Not beneficial when excess phyla
    - Proteobacteria (Enterobacteriaceae family, Escherichia genus, Collinsella genus)
    - Fusobacteria - Fusobacterium nucleatum

- Change in ratios of phyla – change in Firmicutes/Bacteroidetes ratio
  - Balanced Firmicutes/Bacteroidetes ratio – Beneficial
  - Increase in Firmicutes/Bacteroidetes ratio – associated with obesity
- Change in bacteria that are shown to be associated with inflammation, obesity, postprandial glucose metabolism, cardiometabolic health
  - Beneficial bacteria - *Prevotella copri*, *Blastocystis* spp., *Faecalibacterium prausnitzii*, *Haemophilus parainfluenzae*, *Firmicutes bacterium CAG95*, *Eubacterium. eligens*, *Roseburia CAG182*, *Oscillibacter sp 57\_20*, *Firmicutes bacterium CAG170*, *Oscillibacter sp PC13*, *Clostridium sp CAG167*, *Bifidobacterium. animalis*, *Romboutsia ilealis*, *Veillonella atypica*, *V. infantium*, *V. dispar*
  - Harmful bacteria - Clostridia (*C. spiroforme*, *C. bolteae CAG59*, *C. bolteae*, *Clostridium CAG58*, *C. symbiosum*, *C. innocuum*, *C. leptum*), *Flavonifractor plautii*, *Rumminococcus. gnavus*, *Eggerthella lenta*, *E. coli*, *Ruthenibacterium. lactatiformans*, *Collinsella intestinalis*, *Blautia hydrogenotrophica*, *Anaerotruncus colihominis*, *Bacteroides thetaiotaomicron*
- Change in bacteria that are shown to be associated with different cancers (colorectal cancer, breast cancer, other cancers) Beneficial bacteria - *Bifidobacterium*, *Lactobacillus*, *Lactococcus*, *Roseburia*, *Akkermansia*, *Faecalibacterium prausnitzii*, *Eubacterium rectale*, *Roseburia faecis*, *Eulonchus halli*, *Prevotella copri*, *Parabacteroides distasonis*, *Sphingomonadaceae*
- Harmful bacteria - *Bacteroides fragilis*, *Enterobacteriaceae* spp., *Listeria monocytogenes*, *Fusobacterium nucleatum*, *Streptococcus gallolyticus*, *Clostridium difficile*, *Clostridium*

septicum, Enterococcus faecalis, Escherichia coli, Peptostreptococcus stomatis, Helicobacter pylori, Ruminococcus torques, Bilophila wadsworthia, Streptococcus agalactiae, Pseudomonas, Alistipes, Atopobium, Hydrogenophaga, Gluconacetobacter, Bacillus cereus.

- Most reported bacteria from the studies included in the review
- Beneficial - Faecalibacterium, Bifidobacterium, Lactobacillus, Lactococcus, Parabacteroides, Roseburia, Eubacterium rectale, Eubacterium hallii, Akkermansia, Akkermansia muciniphila, Prevotella, Prevotella copri, Anaerostipes, Anaerostipes hadrus, Veillonellaceae, Parabacteroides distasonis, Gemmiger, Moraxellaceae
- Harmful - Bacteroides, Bacteroides fragilis, Fusobacteria, Streptococcus, Clostridium, Clostridium symbiosum, Clostridium perfringens, Dialister, Alistipes, Bilophila, Ruminococcus gnavus, Dorea, Actinomyces, Odoribacter, Blautia, Lachnospira, Lachnospiraceae, Sutterella, Enterobacteriaceae, Klebsiella sp
- Not clearly known - Ruminococcus bromi, Oscillospira

**Table S1: Summary Tables Presenting Extracted Evidence from Reviewed Articles**

Table S1.a. Summary tables – Dairy

| Specific foods - Dairy (n=8)                                                                                                                                                                                                                                                                                              | No of studies | Type of design                                                                   | Beneficial effect                                                                                                                                                                                                                              | Harmful effect                                                                          | No effect                                                                                                                               |
|---------------------------------------------------------------------------------------------------------------------------------------------------------------------------------------------------------------------------------------------------------------------------------------------------------------------------|---------------|----------------------------------------------------------------------------------|------------------------------------------------------------------------------------------------------------------------------------------------------------------------------------------------------------------------------------------------|-----------------------------------------------------------------------------------------|-----------------------------------------------------------------------------------------------------------------------------------------|
| Kefir - 180 mL/day - Bellikci-Koyu_2019                                                                                                                                                                                                                                                                                   | 1             | Randomized, Controlled Study                                                     | Increase in the Actinobacteria                                                                                                                                                                                                                 |                                                                                         | No effect on other phyla or diversity                                                                                                   |
| High dairy (HD: 1500 mg calcium/day) versus low dairy (LD: 600 mg calcium/day). -Bendtsen_2018<br><br>(HD, consumed $\geq 4$ servings of dairy/day vs AD $\leq 2$ /day) - Khorraminezhad_2021<br><br>High-dairy diet (HDD) (5–6 dairy portions per day) and a low-dairy diet (LDD) ( $\leq 1$ dairy portion - Swarte 2020 | 3             | 2 x A randomized controlled parallel design<br><br>A randomized, crossover Study | The abundance of Lactococcus were significantly increased during the HDD, while the relative abundance of Bilophila significantly decreased.<br>Increase in Faecalibacterium after HD                                                          | The abundance of Streptococcus significantly increased during the HDD                   | No significant changes from the phylum to the genus level or in diversity<br><br>Ratio Bacteroidetes /firmicutes showed no differences. |
| Total dairy intake - highest ( $\geq 0.5$ serving/d) and second highest (1 serving/wk-0.5 serving/d) total dairy intake category, compared with lowest category ( $< 1$ serving/mo - Shuai_2021                                                                                                                           | 1             | Prospective cohort study                                                         | High dairy intake - higher levels of Shannon, Simpson index and beta-diversity.<br>Yogurt consumption was positively associated with Shannon and Observed species.<br>Bifidobacterium were enriched in in the highest total dairy intake group | Streptococcus, and Clostridium were enriched in in the highest total dairy intake group |                                                                                                                                         |
| Whole-fat liquid yogurt - 220 g/day - Chen_2019<br><br>Three types of yogurts (cow's whole-milk yogurt, ewe's semi-skimmed-milk yogurt, ewe's whole-milk yogurt) - Redondo_2019                                                                                                                                           | 2             | A randomized, controlled trial                                                   | Decreased the relative abundance of the Firmicutes phylum                                                                                                                                                                                      |                                                                                         | No differential effect by type of yogurt                                                                                                |

| <b>Specific foods - Dairy (n=8)</b> | <b>No of studies</b> | <b>Type of design</b> | <b>Beneficial effect</b> | <b>Harmful effect</b> | <b>No effect</b>                  |
|-------------------------------------|----------------------|-----------------------|--------------------------|-----------------------|-----------------------------------|
| Whole milk – 250ml/day - Li_2018    | 1                    | Intervention study    |                          |                       | No effect on diversity or on SCFA |

Table S1.b. Summary tables – Meat and fish products

| <b>Specific foods - Meat and fish products (n=7)</b>                                                                                                                                            | <b>No of studies</b> | <b>Type of design</b>                               | <b>Beneficial effect</b>                                                                                                    | <b>Harmful effect</b>                                                                                                                                                           | <b>No effect</b>                                                                   |
|-------------------------------------------------------------------------------------------------------------------------------------------------------------------------------------------------|----------------------|-----------------------------------------------------|-----------------------------------------------------------------------------------------------------------------------------|---------------------------------------------------------------------------------------------------------------------------------------------------------------------------------|------------------------------------------------------------------------------------|
| A standard diet enriched with 100 g of sardines 5 d/wk - Balfegó_2016                                                                                                                           | 1                    | A pilot randomized trial                            | A decrease in Firmicutes/Bacteroidetes ratio<br>An increase in Bacteroides-Prevotella                                       | 1                                                                                                                                                                               | A pilot randomized trial                                                           |
| Atlantic cod in weekly doses of 750 g, Atlantic salmon in weekly doses of 750 g, and no-fish intake - Bratlie_2021                                                                              | 1                    | A randomized, controlled parallel group design      | Higher counts for a few bacteria in the Firmicutes phylum                                                                   | In the Cod and Salmon groups - lower counts for bacteria that belong to the Bacteroidales order in the Bacteroidetes phylum and the Clostridiales order of the Firmicutes phyla |                                                                                    |
| Fried meat - 4 times/week vs no fried meat intake - Gao_2021                                                                                                                                    | 1                    | Randomized controlled-feeding trial                 | The ratio of Firmicutes and Bacteroidetes was decreased in both groups, and it was significantly lower in the control group |                                                                                                                                                                                 | No difference in microbial community richness                                      |
| Consume 2x150 g portions of farmed salmon per week or habitual diet - Urwin_2014                                                                                                                | 1                    | A single-blind, randomized, controlled intervention |                                                                                                                             |                                                                                                                                                                                 | No significant effects on any of the bacteria enumerated in maternal fecal samples |
| High-protein/high red meat (HP) diet (35% protein, 40% carbohydrate, and 25% fat) VS High-carbohydrate/low red meat (HC) diet (17% protein, 58% carbohydrate, and 25% fat) - Benassi-Evans_2010 | 1                    | A Parallel-Group, Randomized, Controlled Study      |                                                                                                                             |                                                                                                                                                                                 | No change in SCFA                                                                  |

| <b>Specific foods - Meat and fish products (n=7)</b>                                                                                                                                                                                                                                                                                                                                                                | <b>No of studies</b> | <b>Type of design</b>                                         | <b>Beneficial effect</b>                                                                                                                                                                                                                                                                        | <b>Harmful effect</b>                                                                                                                                                                                                                                                                                                                                                                 | <b>No effect</b>                                                        |
|---------------------------------------------------------------------------------------------------------------------------------------------------------------------------------------------------------------------------------------------------------------------------------------------------------------------------------------------------------------------------------------------------------------------|----------------------|---------------------------------------------------------------|-------------------------------------------------------------------------------------------------------------------------------------------------------------------------------------------------------------------------------------------------------------------------------------------------|---------------------------------------------------------------------------------------------------------------------------------------------------------------------------------------------------------------------------------------------------------------------------------------------------------------------------------------------------------------------------------------|-------------------------------------------------------------------------|
| <p>‘Animal-based diet’- composed of meats, eggs, and cheeses VS ‘Plant-based diet’- rich in grains, legumes, fruits, and vegetables - David_2014</p> <p>Mediterranean diet - including meat and meat products, poultry, and fish VS Vegetarian diet - abstinence to consume meat and meat products, poultry, fish, seafood and flesh from any other animal, but included eggs and dairy products - Pagliai_2020</p> | 2                    | <p>Dietary intervention</p> <p>Dietary intervention study</p> | <p>Decrease in the levels of Firmicutes that metabolize dietary plant polysaccharides (Roseburia, Eubacterium rectale and Ruminococcus bromii) in animal-based diet</p> <p>MD led to an increase of 10% in propionate</p> <p>Carbohydrate was positively correlated with butyric acid in MD</p> | <p>Reduction in fecal propionate and an increase in both branched chain SCFA, isobutyric and isovaleric acid after vegetarian diet</p> <p>Increase in the abundance of bile-tolerant microorganisms (Alistipes, Bilophila and Bacteroides) after animal-based diet</p> <p>Fat intake was negatively correlated with acetic acid, propionic acid, valeric acid and isobutyric acid</p> | <p>No change in alpha diversity</p> <p>No change in alpha diversity</p> |



Table S1.c. Summary tables – Legumes and nuts

| Specific foods- Legumes_nuts (n=15)                                                                                                                                                                                                                                                                                                                                                              | No of studies | Type of design                                                                                                                      | Beneficial effect                                                                                                                                                                                                                                                                                                                                                                                                        | Harmful effect                                                                                                                                                                                                                                                                                                                                                                                                | No effect                                                                                                                                                                                                                       |
|--------------------------------------------------------------------------------------------------------------------------------------------------------------------------------------------------------------------------------------------------------------------------------------------------------------------------------------------------------------------------------------------------|---------------|-------------------------------------------------------------------------------------------------------------------------------------|--------------------------------------------------------------------------------------------------------------------------------------------------------------------------------------------------------------------------------------------------------------------------------------------------------------------------------------------------------------------------------------------------------------------------|---------------------------------------------------------------------------------------------------------------------------------------------------------------------------------------------------------------------------------------------------------------------------------------------------------------------------------------------------------------------------------------------------------------|---------------------------------------------------------------------------------------------------------------------------------------------------------------------------------------------------------------------------------|
| Daily intake of flaxseed mucilage (10 g) or placebo for 6 wks - Brahe_2015<br><br>Flax Seed ground - 10 g/d of for 6 weeks - McCann_2021 - McCann_2021                                                                                                                                                                                                                                           | 2             | RCT, a single-blinded, parallel-group<br><br>A randomized, crossover intervention study                                             | Fusobacteria, Pyramidobacter and Odoribacter -reduced in the FS                                                                                                                                                                                                                                                                                                                                                          | alpha diversity-Shannon diversity index and Simpson's inverse index decreased<br>Clostridium genus – increased<br>Faecalibacterium prausnitzii species & Ruminococcuslactaris - decreased                                                                                                                                                                                                                     | Did not differ in Alpha and beta diversity (Shannon Diversity Index)                                                                                                                                                            |
| Almonds -1.5oz daily for 3wks - Burns 2016<br><br>Almonds - 56g/day for 8wks - Choo 2021<br><br>Almond - 57 g/d for 8 wk - Dhillon_2019<br><br>Almonds – 42 g/day for 3wks - Holscher_2018_2<br><br>Almond-based low carbohydrate diet (a-LCD) - 56 g/day almonds vs a low-fat diet (LFD) - Ren_2020<br><br>No nuts vs 1.5 servings/d either almonds or pistachios (42.5 g/d) vs 3 servings/d of | 6             | 3x A randomized, crossover study<br><br>A randomized, parallel controlled trial<br><br><br>2xA randomized, controlled, parallel arm | Increases in bacterial community richness, evenness (Simpson's index(1-D), P=.003) and diversity (Faith's phylogenetic diversity<br><br>Increase in alpha diversity & beta-diversity<br><br>Decrease in Bacteroides fragilis<br>Increased Lachnospira, Roseburia, Clostridium, and Dialister<br><br>Increase in Roseburia, Ruminococcus, and Eubacterium in the a-LCD arm<br><br>$\beta$ -diversity larger for pistachio | Increases in the relative abundance of OTUs assigned to three members in the Ruminococcaceae family and one member of the Lachnospiraceae family<br><br>Decreased Actinobacteria, Bifidobacterium and Parabacteroides<br><br>Decrease in Firmicutes in the a-LCD arm<br>Decrease in Bacteroidetes and Bacteroides in the a-LCD arm<br><br>Decrease in lactic acid bacteria after 42.5 or 85 g/d of pistachios | No significant differences in alpha diversity<br><br>No significant change at phylum level<br><br>No change in SCFA<br><br>$\alpha$ -diversity was not affected by either almonds or pistachios<br><br>No change at phyla level |

| Specific foods- Legumes_nuts (n=15)                                                                                                                                                                                                                                                                                                                                                                                                                               | No of studies | Type of design                                                                                       | Beneficial effect                                                                                                                                                                                                                                  | Harmful effect                                                                                                                                                                                                                      | No effect                                                                                                                 |
|-------------------------------------------------------------------------------------------------------------------------------------------------------------------------------------------------------------------------------------------------------------------------------------------------------------------------------------------------------------------------------------------------------------------------------------------------------------------|---------------|------------------------------------------------------------------------------------------------------|----------------------------------------------------------------------------------------------------------------------------------------------------------------------------------------------------------------------------------------------------|-------------------------------------------------------------------------------------------------------------------------------------------------------------------------------------------------------------------------------------|---------------------------------------------------------------------------------------------------------------------------|
| either almonds or pistachios (85 g/d) - Ukhanova_2014                                                                                                                                                                                                                                                                                                                                                                                                             |               |                                                                                                      |                                                                                                                                                                                                                                                    |                                                                                                                                                                                                                                     |                                                                                                                           |
| Canned Chickpea - 200 g/d for 3wks - Fernando_2010                                                                                                                                                                                                                                                                                                                                                                                                                | 1             | A randomized crossover intervention                                                                  | Increase in Faecalibacterium prausnitzii<br>A decrease in Clostridium clusters (C. histolyticum, C. lituseburens and relatives)                                                                                                                    |                                                                                                                                                                                                                                     | No change in alpha diversity, SCFA                                                                                        |
| Walnut - 1.5 servings (42g)/day for 3 wks - Holscher_2018<br><br>Whole walnuts (WD; 57–99 g/d walnuts; 2.7% $\alpha$ -linolenic acid (ALA)), vs a fatty acid–matched diet devoid of walnuts (walnut fatty acid–matched diet; WFMD; 2.6% ALA), vs a diet replacing ALA with oleic acid without walnuts - Tindall_2020                                                                                                                                              | 2             | A controlled-feeding, randomized crossover study                                                     | Change in beta-diversity<br>Increased Faecalibacterium, and Roseburia<br><br>Decreased Ruminococcus, Dorea, and Oscillospira<br><br>Increase in Roseburia, Eubacterium eligens group in WD arm                                                     | Increased Firmicutes and decreased Actinobacteria<br><br>Increase Clostridium, Dialister<br><br>Decrease in Bifidobacterium<br><br>Increase in Lachnospiraceae, Gordonibacter in WD                                                 | No change in alpha diversity<br>No change in alpha diversity<br>No change in Bacteroidetes, Firmicutes, or Proteobacteria |
| Non-fermented soybean milk (NFSM - 100 g/day) or fermented soybean milk (FSM- 100 g/day) for 2 weeks - Inoguchi_2012<br><br>One Revival soy bar per day (160 mg of soy isoflavones and 1 g saponin) - Nakatsu_2014<br><br>Low glycinin soymilk - 500 mL/day(LGS, 49.5% $\beta$ -conglycinin/6% glycinin) VS conventional soymilk (S, 26.5% $\beta$ -conglycinin/38.7% glycinin) VS bovine milk (M, 0% $\beta$ -conglycinin/0% glycinin) - Fernandez-Raudales_2012 | 3             | Randomized controlled-feeding trial<br><br>Experimental design<br><br>Randomized, double-blind trial | Increase in bifidobacteria during NFSM intake.<br>Increase in bifidobacteria and lactobacilli and clostridia decreased during FSM intake.<br><br>Decrease in unclassified Clostridiaceae Firmicutes decreased for both soy-milk groups (LGS and S) | Decrease in Lactobacillus<br><br>Decrease in bacterial diversity and richness (ACE and Chao1 indices) in all arms while unchanged in the M group<br><br>Bifidobacterium decreased within LGS and S and increased within the M group | No change in alpha diversity & in beta-diversity                                                                          |

| Specific foods- Legumes_nuts (n=15)                                                                                     | No of studies | Type of design                | Beneficial effect                                                                                                                                                                                                                                                                                                                              | Harmful effect                                                                                                                                                                     | No effect                                                                            |
|-------------------------------------------------------------------------------------------------------------------------|---------------|-------------------------------|------------------------------------------------------------------------------------------------------------------------------------------------------------------------------------------------------------------------------------------------------------------------------------------------------------------------------------------------|------------------------------------------------------------------------------------------------------------------------------------------------------------------------------------|--------------------------------------------------------------------------------------|
|                                                                                                                         |               |                               | <p>Bacteroidetes increased in both soymilk groups and decreased in the M group</p> <p>Firmicutes to Bacteroidetes ratio decreased in both the LGS and S groups and remained relatively unchanged in the M group</p> <p>Bacteroides-Prevotella increased significantly in LGS but not S or M</p> <p>Faecalibacterium increased in LGS group</p> | <p>Lactobacillus increased within M but not in LGS and S</p> <p>Roseburia tended to increase whereas Prevotella tended to decrease in bovine milk arm and opposite for S group</p> |                                                                                      |
| Legume consumption, including peanuts, soy foods, and other beans - total legume consumption (in grams/day) - Wang_2021 | 1             | Population-based cohort study | Enterobacteriales positively associated with high legume intake                                                                                                                                                                                                                                                                                |                                                                                                                                                                                    | $\alpha$ -diversity or $\beta$ -diversity was not associated with legume consumption |

Table S1.d. Summary tables – Grains

| Specific foods - Grain (n=20)                                                                                                                                                                                                                                                                                                                                                                                                                                                                                                                                                                                                   | No of studies | Type of design                                                                                                                                                                                                                                                                        | Beneficial effect                                                                                                                                                                                                                                                                                                                                                                                                                                                                                                                                                                                                                                   | Harmful effect                                                                                                                                                                                                                                                                                                                               | No effect                                                                                                                                                                                                                                                    |
|---------------------------------------------------------------------------------------------------------------------------------------------------------------------------------------------------------------------------------------------------------------------------------------------------------------------------------------------------------------------------------------------------------------------------------------------------------------------------------------------------------------------------------------------------------------------------------------------------------------------------------|---------------|---------------------------------------------------------------------------------------------------------------------------------------------------------------------------------------------------------------------------------------------------------------------------------------|-----------------------------------------------------------------------------------------------------------------------------------------------------------------------------------------------------------------------------------------------------------------------------------------------------------------------------------------------------------------------------------------------------------------------------------------------------------------------------------------------------------------------------------------------------------------------------------------------------------------------------------------------------|----------------------------------------------------------------------------------------------------------------------------------------------------------------------------------------------------------------------------------------------------------------------------------------------------------------------------------------------|--------------------------------------------------------------------------------------------------------------------------------------------------------------------------------------------------------------------------------------------------------------|
| <p>A diet high in Whole Grains (&gt;80 g/d) or low in WGs (&lt;16 g/d, RG diet) - Ampatzoglou, 2015</p> <p>Whole grain daily (WW - 105 g) or no whole grain (RW) both in energy-restricted diet (deficit of at least 1250 kJ/day) - Christensen_2013</p> <p>Whole grain oat Granola (WGO – 45g/day) or non-whole grain (NWG) - Connolly_2016</p> <p>Whole grain (WG - 48 g/d, 1442 kJ/100 g, 18 g/100 g fiber) or wheat bran (WB - 48 g/d, 1184 kJ/100 g, 27 g/100 g fiber) - Costabile_2008</p> <p>Durum wheat (75%) and whole-grain barley (25%) pasta containing 3 g of barely beta-glucans - 100 g/day - DeAngelis_2015</p> | 6             | <p>Crossover study</p> <p>Dietary intervention, open-label parallel, randomized</p> <p>A randomized, controlled, crossover, double-blinded design</p> <p>A double-blind, randomised, placebo-controlled, crossover study</p> <p>Dietary intervention</p> <p>A placebo-controlled,</p> | <p>Increase in abundance of Bifidobacterium after whole grain daily</p> <p>Decrease in abundance of Bacteroides after no whole grain diet</p> <p>Increase in bifidobacterial, lactobacilli, and total bacteria population after WGO</p> <p>Increase in bifidobacteria during the ingestion of the WG</p> <p>Increase in fecal lactobacilli/enterococci with ingestion of either WB or WG</p> <p>Increase in SCFA (2-methyl-propanoic acid, acetic acid, butanoic acid, and propanoic acid) after the intervention</p> <p>Increase in Roseburia hominis</p> <p>Increase in Prevotella after WG intake</p> <p>Decrease in Dialister, Blautia, and</p> | <p>Decrease in bifidobacteria and total bacteria population after NWG</p> <p>Increase in clostridia during WB intake</p> <p>Fewer total anaerobes, decrease in Firmicutes after the intervention</p> <p>Increase in Clostridiaceae (Clostridium orbiscindens and Clostridiumsp.), and Ruminococcus sp</p> <p>Decrease in Bifidobacterium</p> | <p>No significant change in SCFA or bacterial groups</p> <p>No significant changes in SCFA</p> <p>No change in Chao1 and Shannon index</p> <p>No change at phyla level</p> <p>No change in <math>\alpha</math>-diversity or <math>\beta</math>-diversity</p> |

| Specific foods - Grain (n=20)                                                                                                                                          | No of studies | Type of design                                      | Beneficial effect                                                                                                                                                                                                  | Harmful effect                                                               | No effect                                                                              |
|------------------------------------------------------------------------------------------------------------------------------------------------------------------------|---------------|-----------------------------------------------------|--------------------------------------------------------------------------------------------------------------------------------------------------------------------------------------------------------------------|------------------------------------------------------------------------------|----------------------------------------------------------------------------------------|
| Whole grain (WG) product - 70 g/d(3 biscuits/d) VS Control - 1 package (33 g) of crackers and 3 slices of toasted bread (~27 g) Vitaglione_2015 (C)                    |               | parallel-group randomized trial                     | Collinsella after WG intake                                                                                                                                                                                        |                                                                              |                                                                                        |
| Whole grain market basket -13.7 g of fiber/day VS refined grain market basket - 4.2 g of fiber/day - Cooper_2017                                                       | 4             | A six-week intervention trial                       | Increase in relative abundance of Akkermansia and Lactobacillus in the high fiber group                                                                                                                            | Increase in Clostridiales after whole grain                                  | No significant difference in the relative abundance of any taxa                        |
| Whole grain diet ( $\geq 75$ g/day whole grain) VS a refined grain diet ( $<10$ g/day whole grain) - Roager_2019                                                       |               | A randomized, controlled crossover                  | Increase in Faecalibacterium prausnitzii, one Prevotella copri after whole grain                                                                                                                                   | Increased 3 bacterial taxa within the Ruminococcaceae family) after WGW diet | No change in richness or evenness                                                      |
| Whole grain wheat (WGW) (98 g/d - 17.6 g fiber/100 g) VS colored refined wheat (RW) products (98 g/d - 7.2 g fiber/100 g) - vanTrijp_2021                              |               | Double-blind, randomized, controlled, parallel      | Decrease in Bacteroides thetaiotaomicron after whole grain                                                                                                                                                         | Increase in Lachnospira after WG                                             | No change in $\alpha$ -diversity or $\beta$ -diversity                                 |
| A whole-grain (WG) diet (16 g/1000 kcal - 35 g/d) VS refined grains (RGs) diet (8 g/1000 kcal) - Vanegas_2017                                                          |               | Randomized, controlled, parallel-design human trial | Decreased in bacterial taxon within the Lachnospiraceae family after WGW diet<br><br>Increase in acetate and total SCFA in the WG<br><br>Decrease in Enterobacteriaceae after WG<br>Increase in Roseburia after WG |                                                                              | No change in $\alpha$ -diversity or $\beta$ -diversity<br><br>No change at phyla level |
| Intervention arm - Rye breads with a high-fiber content (7–15%), whole-meal pasta [3.5 dL/wk and high-fiber oat biscuits VS controls - refined white wheat breads with | 4             | A randomized, parallel, 2-arm 12-wk intervention    | Increase in Actinobacteria, Bifidobacterium, Bifidobacteriales,                                                                                                                                                    | Decrease in Bacteroidetes phylum and increase in the members of Clostridium  | No change in microbiota composition                                                    |

| Specific foods - Grain (n=20)                                                                                                                                                                                                                                                                                                                                                                                                                                          | No of studies | Type of design                                                                                                                                    | Beneficial effect                                                                                                                                                                                                                                                              | Harmful effect                                                                                                                                                                                                                                                                 | No effect                                                                                                                                                                                                                                                         |
|------------------------------------------------------------------------------------------------------------------------------------------------------------------------------------------------------------------------------------------------------------------------------------------------------------------------------------------------------------------------------------------------------------------------------------------------------------------------|---------------|---------------------------------------------------------------------------------------------------------------------------------------------------|--------------------------------------------------------------------------------------------------------------------------------------------------------------------------------------------------------------------------------------------------------------------------------|--------------------------------------------------------------------------------------------------------------------------------------------------------------------------------------------------------------------------------------------------------------------------------|-------------------------------------------------------------------------------------------------------------------------------------------------------------------------------------------------------------------------------------------------------------------|
| <p>a low fiber content (4%) and restricted rye intake to 1–2 portions/d.- Lappi_2013</p> <p>Whole-grain wheat (WGW) VS Whole-grain rye (WGR), or Refined wheat (RW) - Vuholm_2017</p> <p>White bread period VS a white rice period - Mano_2018</p> <p>Brown rice flakes 60g (4.4g total dietary fiber) VS Brown rice and barley (consisting of 30 g each - 11.5 g total dietary fiber) VS Barley (consisting of 60 g - 18.7 g total dietary fiber) - Martínez_2013</p> |               | <p>A randomized parallel researcher-blinded parallel intervention study</p> <p>Randomized, crossover trial</p> <p>Randomized cross-over trial</p> | <p>Bifidobacteriaceae after bread period compared to rice period</p> <p>Increase in community evenness (Shannon's and Simpson's), after all interventions</p> <p>Increase in Roseburia, Bifidobacterium and the species E. rectale after intake of diets containing barley</p> | <p>cluster IV (Firmicutes) in the control arm</p> <p>Butyrate decreased in in the refined wheat arm</p> <p>Firmicutes increased and bacteroidetes decreased in all three dietary treatments</p> <p>Increase in Firmicutes/Bacteroidetes ratio</p> <p>Increase in Dialister</p> | <p>No change in the relative abundance of any bacterial taxa after the intervention arm</p> <p>No changes in alpha- and beta-diversity</p> <p>No change at genera level</p> <p>No change in Bacteroidetes and Firmicutes</p> <p>No significant change in SCFA</p> |
| <p>Oatmeal porridge- 60 g/d oatmeal (contained per 100 g - 8.5g dietary fiber, including 4.7g <math>\beta</math>-glucans - Valeur_2016</p> <p>Oatmeal - 80 g/day VS refined white rice 80 g/day - Ye_2020</p>                                                                                                                                                                                                                                                          | 2             | <p>Pilot study - dietary intervention</p> <p>A secondary analysis of a randomized, controlled clinical trial</p>                                  |                                                                                                                                                                                                                                                                                | <p>Decrease in the relative abundance of Bacteroides phylum (and Proteobacteria phylum in the oatmeal arm</p> <p>Increase in the relative abundance of Firmicutes phylum in the oatmeal arm</p>                                                                                | <p>No significant change in SCFA</p> <p>No changes in alpha- and beta-diversity</p>                                                                                                                                                                               |
| <p>Himalaya 292 (96g/d - a novel hull-less barley - higher total dietary fiber) VS whole-wheat (97 g/d) VS refined cereal foods (99 g/d) - Bird_2008</p>                                                                                                                                                                                                                                                                                                               | 1             | <p>A randomized cross-over design</p>                                                                                                             | <p>Higher excretion of butyrate or higher faecal total SCFA excretion during the consumption of Himalaya 292</p> <p>Excretion of anaerobes was significantly</p>                                                                                                               |                                                                                                                                                                                                                                                                                |                                                                                                                                                                                                                                                                   |

| Specific foods - Grain (n=20)                                                                                                                                                                                                                                                  | No of studies | Type of design                                                       | Beneficial effect                                                                                                                     | Harmful effect | No effect                                                                                                                            |
|--------------------------------------------------------------------------------------------------------------------------------------------------------------------------------------------------------------------------------------------------------------------------------|---------------|----------------------------------------------------------------------|---------------------------------------------------------------------------------------------------------------------------------------|----------------|--------------------------------------------------------------------------------------------------------------------------------------|
|                                                                                                                                                                                                                                                                                |               |                                                                      | higher during the consumption of Himalaya 292                                                                                         |                |                                                                                                                                      |
| Foods produced from unrefined flour mix composed an equal percentage of “Timilia”, “Margherito”, and “Russello” (all ancient grains) VS refined flour from “Simeto wheat - Carroccio_2021                                                                                      | 1             | A non-randomized, nutrition intervention                             | Increase in abundance of culturable enterococci, lactic acid bacteria (LABs) and total anaerobes after diet containing ancient grains |                | No change in Shannon species diversity index<br><br>No change at the high taxonomic levels, specifically phyla, families, and genera |
| Simple (a higher proportion of foods containing sucrose and/or high-fructose corn syrup) VS Refined (foods made from refined grains, such as white rice, white bread, and white pasta), VS Unrefined (foods made from whole grains) carbohydrate-containing foods - Faits_2020 | 1             | A post hoc analysis of a randomized clinical trial, crossover design | Increase in Roseburia and Anaerostipes after consumption of the unrefined carbs                                                       |                | No change in $\alpha$ -diversity or $\beta$ -diversity<br>No significant change in SCFA                                              |
| Whole grain (WG) diet - 40g/d dietary fiber & $\leq$ 30g/d red meat products VS Red meat (RM) diet -200g/d - Foerster_2014                                                                                                                                                     | 1             | Randomized Crossover design                                          | Increase in diversity after WG diet                                                                                                   |                | No significant change in SCFA<br>No change at phylum level                                                                           |

Table S1.e. Summary tables – Fiber

| Specific foods – Fiber (n=3)                                                                                                                                                                                                                                             | No of studies | Type of design                | Beneficial effect                                                                                                                                                                                                          | Harmful effect                                                                                                                                                                                            | No effect                                    |
|--------------------------------------------------------------------------------------------------------------------------------------------------------------------------------------------------------------------------------------------------------------------------|---------------|-------------------------------|----------------------------------------------------------------------------------------------------------------------------------------------------------------------------------------------------------------------------|-----------------------------------------------------------------------------------------------------------------------------------------------------------------------------------------------------------|----------------------------------------------|
| ‘African style’ foods increasing their average fiber intake from 14 to 55 g per day and reducing their fat from 35% to 16% of total calories VS ‘Western-style’ diet reducing their fiber from 66 to 12 g per day and increasing their fat from 16% to 52% - Okeefe_2015 | 1             | food exchange intervention    | Increase in butyrate in colonic evacuates 2.5 times after ‘Africanization’ of the diet<br>High-fibre, low-fat dietary intervention in African Americans - associated with an increase of Firmicutes, and E. rectaleet rel. | Low-fibre, high-fat intervention in Africans - associated with an increase of F. nucleatum<br>High-fibre, low-fat dietary intervention in African Americans - associated with Clostridium symbiosumet rel |                                              |
| dietary fiber intake 40 g/day - 50 g/day - Oliver_2021                                                                                                                                                                                                                   | 1             | dietary fiber intervention    | A trend to increase in acetate, propionate, butyrate, and valerate<br>Increase in Bifidobacterium, Lactobacillus, Coprococcus and Anaerostipes hadrus after intervention<br>Decrease in Lachnospiraceae after intervention | Decrease in alpha diversity after intervention                                                                                                                                                            |                                              |
| High-fiber diet (increased fiber consumption to 45.1±10.7 g /day) or High-fermented-foods diet (increased consumption to an average of 6.3±2.9 servings/day) - Wastyk_2021                                                                                               | 1             | randomized, prospective study | Increase in microbiota diversity after high-fermented-food diet                                                                                                                                                            | Increase in the genus Lachnospira in the high-fiber-diet arm and a decrease in the high-fermented-food arm                                                                                                | No change in butyrate in high-fiber diet arm |



Table S1.f. Summary tables – Fruits

| Specific foods - Fruits (n=19)                                                                                                                                                                          | No of studies | Type of design                                                | Beneficial effect                                                                                                                                                                         | Harmful effect                                                                                                  | No effect                                                                                                                    |
|---------------------------------------------------------------------------------------------------------------------------------------------------------------------------------------------------------|---------------|---------------------------------------------------------------|-------------------------------------------------------------------------------------------------------------------------------------------------------------------------------------------|-----------------------------------------------------------------------------------------------------------------|------------------------------------------------------------------------------------------------------------------------------|
| Green olives - 12 table green olives/day - Accardi_2016                                                                                                                                                 | 1             | Pilot nutritional intervention                                | A trend towards an increase of Lactobacilli after green olive intake                                                                                                                      |                                                                                                                 |                                                                                                                              |
| Mango 400g/day for 6 wks - Barnes_2019                                                                                                                                                                  | 1             | Clinical pilot trial                                          | A trend toward increased levels of butyric acid and valeric acid                                                                                                                          |                                                                                                                 | No significant change in SCFA<br>No change in microbiota composition at the genus level for Lactobacillus or Bifidobacterium |
| A dried daily portion (equivalent to one apple) of the red-fleshed or placebo (white-fleshed) apple - Barnett_2021                                                                                      | 1             | A randomized, placebo-controlled, crossover                   | Decrease in Streptococcus, Ruminococcus, Blautia, and Roseburia<br>Increase in Butyricicoccus, and Lactobacillus after red apple intake                                                   | Increase in Sutterella, after red apple intake                                                                  | No change in alpha diversity                                                                                                 |
| Sweetened dried cranberries - 42 g daily - Bekiares_2018                                                                                                                                                | 1             | A prospective clinical study                                  | Decrease in Firmicutes, Firmicutes:Bacteroidetes ratio<br>Increase in Bacteroidetes & Akkermansia                                                                                         |                                                                                                                 |                                                                                                                              |
| Cranberry diet (basal/animal-based diet plus 30 g/day of freeze-dried whole cranberry powder) VS control diet (basal/animal-based diet plus 30 g/day of matched placebo powder) - Rodríguez-Morató_2018 | 1             | Randomized, double-blind, cross-over, controlled design trial | A decrease in acetic and butyric acids after animal-based diet was attenuated by cranberry powder<br>Increase in Bacteroidetes and a decrease in Firmicutes after addition of cranberries | Decrease in the gram-negative Bacteroidetes and an increase in gram-positive Firmicutes after animal-based diet | No changes in alpha diversity and beta diversity                                                                             |

| Specific foods - Fruits (n=19)                                                                                                                                                                                                                                                                                                                                                                                               | No of studies | Type of design                                                                                                                                                                                | Beneficial effect                                                                                                                                                                                                                                            | Harmful effect                                                                                                                                                                                                                               | No effect                                                                                                                                                                 |
|------------------------------------------------------------------------------------------------------------------------------------------------------------------------------------------------------------------------------------------------------------------------------------------------------------------------------------------------------------------------------------------------------------------------------|---------------|-----------------------------------------------------------------------------------------------------------------------------------------------------------------------------------------------|--------------------------------------------------------------------------------------------------------------------------------------------------------------------------------------------------------------------------------------------------------------|----------------------------------------------------------------------------------------------------------------------------------------------------------------------------------------------------------------------------------------------|---------------------------------------------------------------------------------------------------------------------------------------------------------------------------|
| <p>Orange juice from Cara Cara or Bahia juices (500ml/day) or an isocaloric control drink containing water sucrose, and vitamin C - Brasili_2019</p> <p>Orange juice 300 mL/day - Cesar_2020</p> <p>Flavonoid-rich orange juice (190mL each 600 <math>\pm</math>5.4 mg flavonoids 2 times/day) VS Flavonoid-low orange flavored cordial drink (190mL each 108 <math>\pm</math>2.6 mg flavonoids 2 times/day) - Park_2020</p> | 3             | <p>A randomized, crossover and controlled trial</p> <p>A controlled nonrandomized clinical study with temporal series intergroup design</p> <p>A Randomized Controlled single-blind Study</p> | <p>Increase of Lactobacillus spp., Bifidobacterium spp and Total anaerobic bacteria</p>                                                                                                                                                                      | <p>Increase in Clostridia OTUs after orange intake</p> <p>Increase in Lachnospiraceae family after intake flavonoid-rich orange juice</p>                                                                                                    | No change in Clostridium spp                                                                                                                                              |
| Dates (7/day - 50 g) VS a control group (maltodextrin–dextrose, 37.1 g) - Eid_2015                                                                                                                                                                                                                                                                                                                                           | 1             | A randomized, controlled, cross-over intervention                                                                                                                                             |                                                                                                                                                                                                                                                              |                                                                                                                                                                                                                                              | No changes in SCFA<br>No significant alterations in faecal microbiota                                                                                                     |
| Standardized freeze-dried strawberry powder (SBP) (2 $\times$ 13g/day) - Ezzat-Zadeh_2021                                                                                                                                                                                                                                                                                                                                    | 1             | Intervention study                                                                                                                                                                            |                                                                                                                                                                                                                                                              |                                                                                                                                                                                                                                              | No change in $\alpha$ -diversity or $\beta$ -diversity<br>No changes in SCFA<br>No changes on the phylum level                                                            |
| <p>Avocado one/day VS no avocado - Henning_2019</p> <p>Avocado 175 g (men) or 140 g (women) daily VS isocaloric control meal- Thompson_2021</p>                                                                                                                                                                                                                                                                              | 2             | <p>Randomized, parallel-controlled, open-label, 2-arm intervention study</p> <p>An investigator-blinded, parallel-</p>                                                                        | <p>A trend to increase in Firmicutes after avocado intake</p> <p>Increase in Veillonellaceae and Prevotellaceae after avocado intake</p> <p>Increased Phylogenetic Diversity, a measure of microbiota <math>\alpha</math>-diversity in the avocado group</p> | <p>Increases in Dialister, Sutterella, Bilophila, Holdemanella, Herbaspirillum, and Acetivibrio after avocado intake</p> <p>A trend to increase for Ruminococcaceae after avocado intake</p> <p>Increase in Alistipes, Ruminococcus, and</p> | <p>No change in <math>\alpha</math>- and <math>\beta</math>-diversity<br/>No change in Bacteroidetes</p> <p>No significant change in other phyla after avocado intake</p> |

| Specific foods - Fruits (n=19)                                                                                                                                                                                                           | No of studies | Type of design                                                                              | Beneficial effect                                                                                                                                                                                                                                                                                                                                     | Harmful effect                                                                                                                                                                                                                                                  | No effect                                                                  |
|------------------------------------------------------------------------------------------------------------------------------------------------------------------------------------------------------------------------------------------|---------------|---------------------------------------------------------------------------------------------|-------------------------------------------------------------------------------------------------------------------------------------------------------------------------------------------------------------------------------------------------------------------------------------------------------------------------------------------------------|-----------------------------------------------------------------------------------------------------------------------------------------------------------------------------------------------------------------------------------------------------------------|----------------------------------------------------------------------------|
|                                                                                                                                                                                                                                          |               | arm, randomized controlled trial                                                            | <p>Weighted Unifrac distances, a measure of <math>\beta</math>-diversity, tended to be greater in the avocado group</p> <p>Increase in Fecal acetate in the avocado group</p> <p>Increase in Faecalibacterium (P=0.07) in the avocado group</p> <p>Decrease in Roseburia and Ruminococcus in the avocado group</p>                                    | Lachnospira in the avocado group                                                                                                                                                                                                                                |                                                                            |
| A (poly)phenol-rich extract (116 mg, 75 g berries), a whole fruit powder (12 mg, 10 g berries), or placebo (maltodextrin) daily - Istas_2019                                                                                             | 1             | A double-blind, parallel design, randomized controlled trial                                | Increase in Anaerostipes after consumption of aronia extract                                                                                                                                                                                                                                                                                          | Increases in Bacteroides after aronia whole fruit                                                                                                                                                                                                               | No changes in gut microbiota diversity                                     |
| <p>Fruits and vegetables (FV) group 3 servings/d VS whole grain (WG) servings/d VS refined grain 3 servings/d - Kopf_2018</p> <p>Fruit and vegetable intake in quartiles with the lowest quartile indicating low intake - Jiang_2020</p> | 2             | <p>A randomized controlled - parallel arm feeding trial</p> <p>Prospective cohort study</p> | <p>Increase in <math>\alpha</math>-diversity in FV groups but no change in other group</p> <p>Habitual fruit intake was positively associated with Observed species, Shannon index and Chao 1 index</p> <p>Fruit in-take was prospectively positively associated with 31 gut microbial OTUs assigned to Faecalibacterium prausnitzii, Akkermansia</p> | <p>Fruit in-take was prospectively positively associated with gut microbial OTUs assigned to Ruminococcaceae, Clostridiales, Acidaminococcus, and Enterobacteriaceae.</p> <p>Vegetable intake was positively associated with 1 OTU belonging to Lachnospira</p> | <p>No changes in SCFA</p> <p>No significant change in bacterial genera</p> |

| Specific foods - Fruits (n=19)                                                                                                                                                                                                                               | No of studies | Type of design                 | Beneficial effect                                                                                                                                                                                    | Harmful effect                                                                                                | No effect                                                                                                                                                                                 |
|--------------------------------------------------------------------------------------------------------------------------------------------------------------------------------------------------------------------------------------------------------------|---------------|--------------------------------|------------------------------------------------------------------------------------------------------------------------------------------------------------------------------------------------------|---------------------------------------------------------------------------------------------------------------|-------------------------------------------------------------------------------------------------------------------------------------------------------------------------------------------|
|                                                                                                                                                                                                                                                              |               |                                | muciniphila, Prevotella stercorea, and Prevotella copri.                                                                                                                                             |                                                                                                               |                                                                                                                                                                                           |
| One medium banana (120gm) VS one cup of banana-flavoured drink (170 ml) VS one cup of water (170 ml) - Mitsou_2011                                                                                                                                           | 1             | A randomised, controlled trial | Increase in bifidobacterial levels in the banana group                                                                                                                                               |                                                                                                               | No change SCFA                                                                                                                                                                            |
| Boysenberry juice beverage (350ml/d - 750 mg polyphenols), VS apple fiber beverage (350ml/d - 7.5 g dietary fiber) VS Boysenberry juice plus apple fiber beverage (350ml/d - 750 mg polyphenols plus 7.5 g dietary fiber) VS placebo beverage - Wallace_2015 | 1             | Placebo-controlled crossover   |                                                                                                                                                                                                      |                                                                                                               | No change SCFA<br>No differences in fecal levels of total bacteria, Bacteroides-Prevotella-Porphyromonas group, Bifidobacterium species, Clostridiumperfringens, or Lactobacillus species |
| Sun dried raisins 3X28.3 g each daily - Wijayabahu_2019                                                                                                                                                                                                      | 1             | Dietary intervention           | A trend towards an increased relative abundance of Bacteroidetes and decreased relative abundance of Firmicutes<br><br>Increased in Faecalibacterium prausnitzii.<br><br>Decrease in Klebsiella spp. | Decrease in Prevotella sp. and Bifidobacterium spp<br><br>Increased in Bacteroidetes sp. and Ruminococcus sp. | No changes in alpha diversity and beta diversity                                                                                                                                          |
| Two SUNGold Kiwifruit every day - Wilson_2018                                                                                                                                                                                                                | 1             | Pilot intervention trial       | Increase in the relative abundance of bacterial family Coriobacteriaceae                                                                                                                             |                                                                                                               | No changes in alpha diversity                                                                                                                                                             |

Table S1.g. Summary tables – Vegetables

| Specific foods - Vegetables (n=10)                                                                                                                               | No of studies | Type of design                                               | Beneficial effect                                                                                                                                                                                                                                                                                                                                                                                                                                                                               | Harmful effect                                                                                                                                                                                     | No effect                                                                                          |
|------------------------------------------------------------------------------------------------------------------------------------------------------------------|---------------|--------------------------------------------------------------|-------------------------------------------------------------------------------------------------------------------------------------------------------------------------------------------------------------------------------------------------------------------------------------------------------------------------------------------------------------------------------------------------------------------------------------------------------------------------------------------------|----------------------------------------------------------------------------------------------------------------------------------------------------------------------------------------------------|----------------------------------------------------------------------------------------------------|
| Green leafy vegetables (GLV) - 1 cup/day (including spinach, kale, collards, mustard greens, and turnip greens) VS habitual diet (high in red meat) - Frugé_2021 | 1             | Randomized controlled crossover trial                        |                                                                                                                                                                                                                                                                                                                                                                                                                                                                                                 |                                                                                                                                                                                                    | No changes in alpha diversity<br>No significant differences within phyla b/n groups or across time |
| Fresh (180 g/day) vs fermented kimchi (180 g/day) group - Han_2015<br><br>Fermented kimchi intake (100g/day) - Park_2021                                         | 2             | A randomized controlled clinical<br><br>Dietary intervention | Decrease in Firmicutes/Bacteroidetes ratio in response to both groups of kimchi intervention<br><br>Increase in Actinobacteria after kimchi intervention in both group<br><br>Increase in Bacteroides and Prevotella and a decrease Blautia after intake of fermented kimchi<br>Increased in observed index, Chao1 Richness index and Shanon index after fermented kimchi intake<br><br>Decrease in Enterococcua, Coryobacteriaceau in patients with advanced colon adenoma after kimchi intake | Increase in Proteobacteria after kimchi intervention in both group<br><br>Decrease in Roseburia, Bifidobacterium spp., and Akkermansia in patients with advanced colon adenoma after kimchi intake |                                                                                                    |

| Specific foods - Vegetables (n=10)                                                                                                                                                                                                                                                                                                                                                                                                                                                                                                                                                                        | No of studies | Type of design                                                                                                                               | Beneficial effect                                                                                                                                                                                                                                                                                                  | Harmful effect                                                                                                                                                                                                                                                                                   | No effect                                                                                              |
|-----------------------------------------------------------------------------------------------------------------------------------------------------------------------------------------------------------------------------------------------------------------------------------------------------------------------------------------------------------------------------------------------------------------------------------------------------------------------------------------------------------------------------------------------------------------------------------------------------------|---------------|----------------------------------------------------------------------------------------------------------------------------------------------|--------------------------------------------------------------------------------------------------------------------------------------------------------------------------------------------------------------------------------------------------------------------------------------------------------------------|--------------------------------------------------------------------------------------------------------------------------------------------------------------------------------------------------------------------------------------------------------------------------------------------------|--------------------------------------------------------------------------------------------------------|
| Inulin-type Fructans-rich Vegetables (ITF-rich - artichoke, artichoke bottoms, Onion, garlic, shallot, salsify, Leek, scorzonera, gratin, Celery root) - $\geq 9$ g/day of fructans VS habitual diet - Hiel_2019                                                                                                                                                                                                                                                                                                                                                                                          | 1             | A single group-design intervention                                                                                                           | Increase in Actinobacteria phylum and class, Actinobacteridae subclass, Bifidobacteriales order, Bifidobacteriaceae family, and Bifidobacterium genus in ITF-rich veggies arm<br><br>Decrease in the Alistipes genus and Oscillibacter genus, and an increase in the Prevotellaceae family in ITF-rich veggies arm | Decrease in observed species index of richness                                                                                                                                                                                                                                                   | No change in SCFA production, at phylum and family levels                                              |
| Broccoli plus base diet (200 g/day (20 g daikon radish) vs base diet (control diet – American foods) - Kaczmare_2019<br><br>Low-Brassica diet (84 g frozen broccoli, 84 g frozen cauliflower, and a single portion of the participant's choice per wk) VS High-Brassica diet (6X 84 g of frozen broccoli, 6X 84 g of frozen cauliflower and 6X300 g of a broccoli and sweet potato soup containing 84 g broccoli. - Kellingray_2017<br><br>Broccoli sprouts (20 g/day - 4.4 mg/g sulforaphane glucosinolates) Vs the alfalfa sprouts (AS) group (20 g/day – no sulforaphane glucosinolates) - Yanaka_2018 | 3             | Randomized crossover a single-blind, design<br><br>Randomized crossover study<br><br>A placebo-controlled semi-open label intervention trial | Increase in Bacteroidetes phylum & Bacteroides genus after broccoli consumption<br>Decrease in Firmicutes after broccoli consumption<br>Increase in ratio of Bacteroidetes to Firmicutes after broccoli                                                                                                            | Decrease in beta diversity after broccoli consumption<br><br>Decrease in sulphate-reducing bacteria, Rikenellaceae, Ruminococcaceae, Mogibacteriaceae, Clostridium and unclassified Clostridiales after increased Brassica consumption.<br><br>Decrease in Bifidobacterium after broccoli intake | No change in alpha diversity<br><br>No change gut microbiota composition<br>No changes in lactobacilli |
| Low-phytochemical basal diet VS Single-cruciferous diet (basal diet + 7 g                                                                                                                                                                                                                                                                                                                                                                                                                                                                                                                                 | 1             | Randomized, crossover, controlled                                                                                                            | Eubacterium hallii, Phascolarctobacterium                                                                                                                                                                                                                                                                          |                                                                                                                                                                                                                                                                                                  |                                                                                                        |

| Specific foods - Vegetables (n=10)                                                                                                                                                                                                                                                      | No of studies | Type of design                        | Beneficial effect                                                                                                                                                                                                 | Harmful effect                                                                                                                                     | No effect |
|-----------------------------------------------------------------------------------------------------------------------------------------------------------------------------------------------------------------------------------------------------------------------------------------|---------------|---------------------------------------|-------------------------------------------------------------------------------------------------------------------------------------------------------------------------------------------------------------------|----------------------------------------------------------------------------------------------------------------------------------------------------|-----------|
| cruciferous vegetables/ (kg body weight a day)) VS Double-cruciferous diet (basal diet + 14 g cruciferous vegetables/(kg body weight a day)) VS Mixed diet (basal diet + 7 g cruciferous vegetables/(kg body weight a day) + 4 g apiaceous vegetables/(kg body weight a day)) - Li_2009 |               |                                       | faecium, Alistipes putredinis, and Eggerthella spp. were associated with cruciferous vegetable intake.                                                                                                            |                                                                                                                                                    |           |
| Tomato juice (330 ml/d - provided 37.0 mg lycopene and 1.6 mg $\beta$ -carotene) VS Carrot juice (330 ml/d – 27.1 mg $\beta$ -carotene and 13.1 mg $\alpha$ -carotene) - Schnäbele_2008                                                                                                 | 1             | A randomized crossover trial          | No change in SCFA                                                                                                                                                                                                 |                                                                                                                                                    |           |
| Ginger juice (20 ml/d) VS sterile 0.9% sodium chloride - Wang_2020                                                                                                                                                                                                                      | 1             | Randomized controlled crossover trial | Anti-inflammatory<br>Faecalibacterium after ginger intake<br><br>A decreased relative abundance of the Prevotella-to-Bacteroides ratio and pro-inflammatory Ruminococcus_1 and Ruminococcus_2 after ginger intake | Decrease in evenness and in richness after ginger intake<br><br>Increase in Proteobacteria, Firmicutes-to-Bacteroidetes ratio, after ginger intake |           |

Table S1.h. Summary tables – Macronutrients

| Specific foods – Macronutrients (n=14)                                                                                                                                                                                                                                                                                                                                                                                                                                                                                                                                                                                                                                                                                                                                                                                                                                                                                                     | No of studies | Type of design                                                                                                                                                                                                                                                   | Beneficial effect                                                                                                                                                                                                                                                                                                                                                                                                                                                                                                                     | Harmful effect                                                                                                                                                                                                                                                                                                                                                                                                                                                                                                               | No effect                                                                                  |
|--------------------------------------------------------------------------------------------------------------------------------------------------------------------------------------------------------------------------------------------------------------------------------------------------------------------------------------------------------------------------------------------------------------------------------------------------------------------------------------------------------------------------------------------------------------------------------------------------------------------------------------------------------------------------------------------------------------------------------------------------------------------------------------------------------------------------------------------------------------------------------------------------------------------------------------------|---------------|------------------------------------------------------------------------------------------------------------------------------------------------------------------------------------------------------------------------------------------------------------------|---------------------------------------------------------------------------------------------------------------------------------------------------------------------------------------------------------------------------------------------------------------------------------------------------------------------------------------------------------------------------------------------------------------------------------------------------------------------------------------------------------------------------------------|------------------------------------------------------------------------------------------------------------------------------------------------------------------------------------------------------------------------------------------------------------------------------------------------------------------------------------------------------------------------------------------------------------------------------------------------------------------------------------------------------------------------------|--------------------------------------------------------------------------------------------|
| <b>Protein</b><br>Very-low-calorie ketogenic diets (VLCKD-780 kcal/day) with whey protein VS vegetable protein VS animal protein - Basciani_2020<br><br>A moderately high-protein diet (MHP - 40% energy from carbohydrates, 30% from proteins, and 30% from lipids) VS A low fat diet (LF - 60% of total energy from carbohydrates, 18% from proteins, and 22% from lipids) - Cuevas-Sierra_2021<br><br>Calorie-restricted high protein diet (HPD)(30% calorie intake) VS Calorie-restricted normal protein diet (NPD) (15% calorie intake) - Dong_2020<br><br>Recommended dietary intake (RDA) of protein (0.8 g protein/kg body weight per d) VS 2RDA (1.6 g protein/kg body weight per d) - Mitchell_2020<br><br>High-protein and low-carbohydrate (HPLC; 29% protein, 5% carbohydrate, and 66% fat as calories) diet VS High-protein and moderate-carbohydrate (HPMC; 28% protein, 35% carbohydrate, and 37% fat) diet - Russell_2011 | 5             | A prospective, open, nutritional intervention pilot study<br><br>Weight loss intervention study<br><br>A dietary intervention trial<br><br>A Parallel-Group, Randomized, Controlled Study<br><br>A randomized, crossover design, 9-wk dietary intervention study | Higher reduction in Firmicutes in whey protein and vegetable protein<br>Higher increase in Bacteroidetes after whey protein<br><br>Decrease in Negativicutes, Selenomonadales, Acidaminococcus, Bacteroides clarus, Bifidobacterium adolescentis in both diets<br>Increase in Peptococcaceae in both diets<br><br>Higher Shannon index in HPD<br><br>Decreased in Lachnospiraceae_UCG-004 in the HPD<br>Gemella is enriched in the HPD<br>Increase in Branched-chain fatty acids (BCFAs) isovalerate and isobutyrate after both diets | Decrease in the relative abundance of Firmicutes and Actinobacteria & an increase in Bacteroidetes and Proteobacteria after all VLCKD diets<br><br>Effect on diversity depend on sex<br>A minor trend of increasing Firmicutes and decreasing Bacteroides in both diets<br><br>Decreased in Prevotella_2, Faecalibaculum in the HPD<br><br>Decrease in total SCFA, butyrate after the HPLC diet<br><br>Decrease in total bacteria, Bacteroides, Roseburia/Eubacterium rectale group of butyrate producers with the HPLC diet | no change in beta-diversity<br><br>No change in $\alpha$ -diversity and $\beta$ -diversity |



| Specific foods – Macronutrients (n=14)                                                                                                                                                                                                                                                                                                                                                                                                                                                                                                                                                                                                                                                                                        | No of studies | Type of design                                                                                                                                       | Beneficial effect                                                                                                                                                                                                                                                                                                                                                                                                                                                                                                     | Harmful effect                                                                                                                                                                                                                                                                                                     | No effect                                                                   |
|-------------------------------------------------------------------------------------------------------------------------------------------------------------------------------------------------------------------------------------------------------------------------------------------------------------------------------------------------------------------------------------------------------------------------------------------------------------------------------------------------------------------------------------------------------------------------------------------------------------------------------------------------------------------------------------------------------------------------------|---------------|------------------------------------------------------------------------------------------------------------------------------------------------------|-----------------------------------------------------------------------------------------------------------------------------------------------------------------------------------------------------------------------------------------------------------------------------------------------------------------------------------------------------------------------------------------------------------------------------------------------------------------------------------------------------------------------|--------------------------------------------------------------------------------------------------------------------------------------------------------------------------------------------------------------------------------------------------------------------------------------------------------------------|-----------------------------------------------------------------------------|
| <p><b>Fat</b><br/>Diet with high monounsaturated fat/high glycemic index VS Diet with high monounsaturated fat/low glycemic index VS Diet with high carbohydrate/high glycemic index VS Diet with high carbohydrate/low glycemic index VS Diet with high saturated fat/high glycemic index (control diet) - Fava_2013</p> <p>Low-calorie low-carbohydrate high-fat weight loss diet (WLD - diet plan with energy restriction of 30±10%) - Jaagura_2021</p> <p>Low-fat diet - 50-60% of carbohydrates, 15-20% of protein per day, and maintain the intake of fat at a level of &lt;25% - Liu_2020</p> <p>Lower-fat diet (fat 20% energy and carbohydrate 66% energy) VS Moderate-fat diet (fat 30% energy and carbohydrate</p> | 6             | <p>Dietary intervention study</p> <p>Dietary intervention study</p> <p>long-term dietary intervention</p> <p>Randomized controlled-feeding trial</p> | <p>Increase in acetate, propionate, and n-butyrate only after the high saturated fat (control diet)<br/>Increase in Bifidobacterium after high carbohydrate diets<br/>Increase in Bacteroides after high carbohydrate/high glycemic index diet.</p> <p>Increase in Faecalibacterium prausnitzii after high carbohydrate/low glycemic index diet and high saturated fat diets</p> <p>Increase in Acinetobacter, Roseburia after low-fat diet</p> <p>Increase in <math>\alpha</math>-diversity after lower-fat diet</p> | <p>Decrease in total bacterial numbers in the high monounsaturated fat diets</p> <p>Decrease in Bifidobacteriaceae<br/>Increase in Enterobacteriaceae, Rikenellaceae, Desulfovibrionaceae</p> <p>Increase in Lachnospira, Dialister and an undefined genus of Clostridiaceae, Anaerotruncus after low-fat diet</p> | <p>No change in alpha diversity</p> <p>No change in at the phylum level</p> |

| Specific foods – Macronutrients (n=14)                                                                                                                                                                                                                                                                                                                                                                                                                                                                                | No of studies | Type of design                                                                | Beneficial effect                                                                                                                                                                                                                                                                                                                       | Harmful effect                                                                                                                                                                                                                           | No effect                                                                                                                                                                                                              |
|-----------------------------------------------------------------------------------------------------------------------------------------------------------------------------------------------------------------------------------------------------------------------------------------------------------------------------------------------------------------------------------------------------------------------------------------------------------------------------------------------------------------------|---------------|-------------------------------------------------------------------------------|-----------------------------------------------------------------------------------------------------------------------------------------------------------------------------------------------------------------------------------------------------------------------------------------------------------------------------------------|------------------------------------------------------------------------------------------------------------------------------------------------------------------------------------------------------------------------------------------|------------------------------------------------------------------------------------------------------------------------------------------------------------------------------------------------------------------------|
| <p>56% energy) VS Higher-fat diet (fat 40% energy and carbohydrate 46% energy) - Wan_2019</p> <p>Diets rich in saturated fat (SAT, 59E% fat), VS rich in unsaturated fat (UNSAT, 60E% fat), VS rich in simple sugars (CARB, 24E% fat), all diets were excess of 1000 kcal/day - Jian_2021</p> <p>Overfeeding program - High-fat diets (HFDs) - 48 energy percent (EN%) from fat (mainly SFAs - whipping cream (341 mL/d)), 34 EN% from carbohydrates, and 18EN% from protein; a surplus of 1000 kcal/d - Ott_2018</p> |               | <p>A randomized trial</p> <p>A single-arm, prospective intervention study</p> | <p>Decrease in Firmicutes after higher-fat diet</p> <p>Decrease in ratio of Firmicutes to Bacteroidetes after moderate-fat and high-fat diet</p> <p>Increase in Faecalibacterium with lower-fat diet</p> <p>Increase in Lactococcus and Escherichia coli after CARB</p> <p>Increase in butyrate producers and Roseburia after UNSAT</p> | <p>Increase in Proteobacteria after SAT diet</p> <p>Increase in Lachnospira and unclassified Ruminococcaceae after UNSAT</p>                                                                                                             | <p>No change in alpha diversity or Firmicute to Bacteroidetes ratio</p> <p>No change in <math>\alpha</math>-diversity &amp; <math>\beta</math>-diversity</p> <p>No change in fecal bacterial populations after HFD</p> |
| <p><b>Carbohydrates</b></p> <p>Very low-carbohydrate, high-fat diet- (LC, 35 % of total energy as protein, 61 % as fat and 4 % as carbohydrate) VS High-carbohydrate, high-fiber, low-fat diet- (HC, 24 % as protein, 30 % as fat and 46 % as carbohydrate) - Brinkworth_2009</p>                                                                                                                                                                                                                                     | 2             | A Parallel-Group, Randomized, Controlled Study                                | <p>Fecal total SCFA concentration was positively correlated with the intake of fiber and carbohydrate</p> <p>Faecal bifidobacteria levels decreased in the LC group</p> <p>Increase in proportions of branched chain</p>                                                                                                                | <p>Decrease in acetate, butyrate, and total SCFA concentration in the LC group</p> <p>Total fecal anaerobes increased in the HC group</p> <p>Decrease in alpha diversity, richness, and evenness of the microbiota after the RS diet</p> | <p>No change in fecal propionic concentrations</p> <p>No change in lactobacilli or anaerobe:aerobe ratio</p>                                                                                                           |

| <b>Specific foods – Macronutrients (n=14)</b>                                                                    | <b>No of studies</b> | <b>Type of design</b>                   | <b>Beneficial effect</b>                                                                                                                                                                                                    | <b>Harmful effect</b>                                                                                                                                                                  | <b>No effect</b> |
|------------------------------------------------------------------------------------------------------------------|----------------------|-----------------------------------------|-----------------------------------------------------------------------------------------------------------------------------------------------------------------------------------------------------------------------------|----------------------------------------------------------------------------------------------------------------------------------------------------------------------------------------|------------------|
| Diet high in type 3 resistant starch (RS)<br>VS diet high in non-starch polysaccharides (NSPs)<br>- Salonen_2014 |                      | Randomized cross-over design            | SCFA (isobutyrate and isovalerate) after RS diet                                                                                                                                                                            | Decrease in total SCFA, acetate, propionate and butyrate in RS diet<br>Increase in Ruminococcaceae phylotypes on the RS diet<br>Increase in Lachnospiraceae phylotypes on the NSP diet |                  |
| <b>Multiple macronutrients and other nutrients</b><br>Diet records from 24 hr dietary recall - Carrothers_2015   | 1                    | Prospective, longitudinal investigation | Higher Spirochaetes is associated with higher protein intake<br>Higher Firmicutes is associated with high n-3, n-6 FAs and higher beta-carotene<br>Higher Faecalibacterium is associated with higher insoluble fiber intake | Higher Firmicutes and lower Bacteroidetes associated with higher Carbohydrate, protein intake                                                                                          |                  |

Table S1.i. Summary tables – Oils and seasonings

| Specific foods – Oils and seasonings (n=5)                                                                                                                                                                                                                                                                                                            | No of studies | Type of design                                                   | Beneficial effect                                                                                                                                                                                                                                                                 | Harmful effect | No effect                                                                                                                           |
|-------------------------------------------------------------------------------------------------------------------------------------------------------------------------------------------------------------------------------------------------------------------------------------------------------------------------------------------------------|---------------|------------------------------------------------------------------|-----------------------------------------------------------------------------------------------------------------------------------------------------------------------------------------------------------------------------------------------------------------------------------|----------------|-------------------------------------------------------------------------------------------------------------------------------------|
| 14% (0.425 g) of the ADI for aspartame and 20% (0.136 g) of the ADI for sucralose - Ahmad_2020                                                                                                                                                                                                                                                        | 1             | Randomized, double-blind crossover and controlled clinical trial |                                                                                                                                                                                                                                                                                   |                | No change in richness and evenness, SCFA, bacteria phyla and genus-level taxa                                                       |
| No spices VS Low spices - a mixture of 7 dried spice powders at doses 6 g VS high spices- 12g spices<br>Polyphenol-rich mixed spices - turmeric, cumin, coriander, amla (Indian gooseberry), cinnamon, clove, and cayenne pepper - KhineWWT_2021                                                                                                      | 1             | Randomized, crossover, acute, food based intervention trial      | Decrease in Bacteroides was with increasing spice doses<br>Increase in Bifidobacterium with increasing spice doses                                                                                                                                                                |                | No change in alpha-diversity                                                                                                        |
| Daily containing 25 mL of one of the test oils: soybean oil, extra virgin olive oil or coconut oil - NettoCândido_2021                                                                                                                                                                                                                                | 1             | Randomized, parallel, double-blind clinical trial                | Increase in microbial richness (Chao 1 index) after the soybean oil                                                                                                                                                                                                               |                | No change in Shannon and Simpson indices, in beta-diversity, in SCFA<br>No change at phyla level, in Firmicutes/Bacteroidetes ratio |
| 50g Extra Virgin Olive Oil (EVOO) daily - Olalla_2019<br><br>Mediterranean Diet (MD) rich in High Quality-Extra Virgin Olive Oil (HQ-EVOO) - (55–60% carbohydrates, mainly complex ones, 25–30% polyunsaturated and monounsaturated fats, 15–20% proteins and received a low-calorie MD (Kcal 1,552 ± 160). Utilized 40 g/die of HQ-EVOO - Luisi_2019 | 2             | Experimental single arm open study<br><br>Dietary intervention   | Increase in Gardnerella, and a decrease of Mogibacterium, Dethiosulfovibrionaceae, and Coprococcus after intervention<br><br>Increase in Bulleidia moorei and a decrease of the Bacilli species after intervention<br><br>Increase in Lactic Acid Bacteria after the intervention |                | No change alpha diversity, beta diversity                                                                                           |

Table S1.j. Summary tables – Coffee and Tea

| Specific foods - Coffee and Tea (n=3)                                                                                | No of studies | Type of design                           | Beneficial effect                                                                                                                                                                                                                                                                                                                                                                                                                                                                                                                                                                                        | Harmful effect | No effect                                               |
|----------------------------------------------------------------------------------------------------------------------|---------------|------------------------------------------|----------------------------------------------------------------------------------------------------------------------------------------------------------------------------------------------------------------------------------------------------------------------------------------------------------------------------------------------------------------------------------------------------------------------------------------------------------------------------------------------------------------------------------------------------------------------------------------------------------|----------------|---------------------------------------------------------|
| A single-dose serving of sugar free black coffee (30ml; ~8g <i>Coffea arabica</i> ground coffee powder) - Chong_2020 | 2             | A non-randomized, nutrition intervention | Increase in Prevotella and reduction in Bacteroidetes after coffee intake                                                                                                                                                                                                                                                                                                                                                                                                                                                                                                                                |                | No change in diversity after coffee intake              |
| Coffee (3 cups/day, 3.4 g of instant coffee powder) - Jaquet_2009                                                    |               | A single group-design intervention       | Increase in Bifidobacterium spp. after coffee intake                                                                                                                                                                                                                                                                                                                                                                                                                                                                                                                                                     |                |                                                         |
| Green tea liquid (GTL) (400 mL per day) - Yuan_2018                                                                  | 1             | Intervention study                       | <p>Increase in <math>\alpha</math>-diversity &amp; <math>\beta</math>-diversity with GTL</p> <p>Increase in Firmicutes and Actinobacteria, and Increase in Bifidobacterium and Bifidobacterium to Enterobacteriaceae ratio</p> <p>Decrease in Bacteroidetes, Prevotellaceae, proinflammatory Fusobacterium genus, &amp; uncultured Prevotella</p> <p>9</p> <p>Increase in SCFA-producing Lachnospiraceae, Ruminococcaceae, Erysipelotrichaceae, Bifidobacteriaceae and Coriobacteriaceae</p> <p>Increase in SCFA-producing Roseburia, Faecalibacterium, Eubacterium, Blautia, Coprococcus, and Dorea</p> |                | Increase in Firmicutes to Bacteroidetes ratio (FIR:BAC) |

Table S1.k. Summary tables – Alcohol and wine

| Specific foods - Alcohol and wine (n=2)                                                         | No of studies | Type of design                                 | Beneficial effect                                             | Harmful effect                                                                                                                | No effect                                                                                                                                                                                                                           |
|-------------------------------------------------------------------------------------------------|---------------|------------------------------------------------|---------------------------------------------------------------|-------------------------------------------------------------------------------------------------------------------------------|-------------------------------------------------------------------------------------------------------------------------------------------------------------------------------------------------------------------------------------|
| Red wine 250 mL/day (439.5 mg of equivalents of polyphenols per day) VS no wine - Belda_2021    | 1             | Randomized and controlled trial                |                                                               | Less dispersion in beta-diversity in the wine arm                                                                             | No change in alpha-diversity in the wine arm<br>No significant changes in the relative abundance of Firmicutes, Bacteroidetes, Actinobacteria, Proteobacteria, Euryarchaeota, Verrucomicrobia phyla, Bacteroidetes/Firmicutes ratio |
| De-alcoholized red wine (272 mL/d), red wine (272 mL/d), or gin (100 mL/d) - Queipo-Ortuño_2012 | 1             | Randomized, crossover, controlled intervention | Increase in Firmicutes and Bacteroidete after red wine intake | Increase in Proteobacteria, and Fusobacteria after red wine intake<br>Increased in Fusobacteria after de-alcoholized red wine |                                                                                                                                                                                                                                     |
